# Supplementary material for: Dietary alpha‐ketoglutarate promotes beige adipogenesis and prevents obesity in middle‐aged mice
Source: PubMed Central journal article supplement (PMC6974731; doi:10.1111/acel.13059), 2019-11-06
Supplement: ACEL-19-e13059-s001.pdf [file ACEL-19-e13059-s001.pdf]

Supplementary Information File:

**Dietary alpha-ketoglutarate promotes beige adipogenesis and prevents obesity in middle-aged mice**

Supplementary Table S1. Primer sequences used for real-time quantitative PCR

| Gene                           | Forward (5'-3')            | Reverse (5'-3')              |
|--------------------------------|----------------------------|------------------------------|
| <b>18s</b>                     | GTAACCCGTTGAACCCCAT        | CCATCCAATCGGTAGTAGCG         |
| <b>Cytochrome C</b>            | TTTCAGGCTTCACCCTAGATGA     | GAAGAATGTTATGTCTACGAATATG    |
| <b>Ucp1</b>                    | ACTGCCACACCTCCAGTCATT      | CTTTCCTCACTCAGGATTGG         |
| <b>Prdm16</b>                  | CAGCACGGTGAAGCCATTC        | GCGTGCATCCGCTTGTG            |
| <b>Pgc1<math>\alpha</math></b> | CCCTGCCATTGTTAAGACC        | TGCTGCTGTTCTGTTTTTC          |
| <b>Cidea</b>                   | ATCACAACTGGCCTGGTTACG      | TACTACCCGGTGTCCATTTCT        |
| <b>Elovl3</b>                  | GATGGTTCTGGGCACCATCTT      | CGTTGTTGTGTGGCATCCTT         |
| <b>Cox7a1</b>                  | CAGCGTCATGGTCAGTCTGT       | AGAAAACCGTGTGGCAGAGA         |
| <b>Idh2</b>                    | CTAGAGTCCCCACCGCAC         | ATCTCGTCACCGTCCATCTC         |
| <b>Ppar<math>\gamma</math></b> | AGCTCCAAGAATACCAAAGTGCGAT  | AGGTTCTTCATGAGGCCTGTTGTAGA   |
| <b>Zfp423</b>                  | GTCACCAGTGCCCAGGAAGAAGAC   | AACATCTGGTTGCACAGTTTACACTCAT |
| <b>Cebpa</b>                   | ATGAGAGAAGGAGGGGAGCAGG     | AGGTGGGAGAGGCGTGGAACTA       |
| <b>Glut4</b>                   | CTCTCAGGCATCAATGCTGTTTTCTA | CGAGACCAACGTGAAGACCGTATT     |
| <b>aP2</b>                     | CGACAGGAAGGTGAAGAGCATCATA  | CATAAACTCTTGTGGAAGTCACGCCT   |
| <b>TET1</b>                    | CACCCTGTGACTGTGATGGAGGTA   | ACTATCTTCTCAATCCGGATTGCCTT   |
| <b>TET2</b>                    | AAGGATGCAATCCAGACAAAGATGAA | TTTAGCAATAGGACATCCCTGAGAGCT  |

Supplementary Table S2. MeDIP primer sequences for *Prdm16*, *Ucp1* and *Zfp423*

| Gene                 | Forward (5'-3')      | Reverse (5'-3')      |
|----------------------|----------------------|----------------------|
| <b>Medip- Prdm16</b> | GACACCGTGACAGCTCTGAA | CTGCGAGTACGGCTACGATT |
| <b>Medip-Ucp1</b>    | GAGTGACAAAAGGCACCACG | GAGTGACAAAAGGCACCACG |
| <b>Medip-Zfp423</b>  | GCACGGGCCTGTTATCTGT  | AGGATGTGAGGAGCGGAGT  |

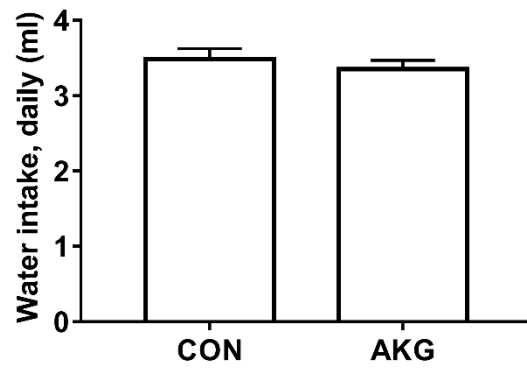

Supplementary Figure 1. Daily water intake of middle-aged mice supplemented with/without AKG. \*  $p < 0.05$  ( $n = 6$ , mean  $\pm$  SEM).

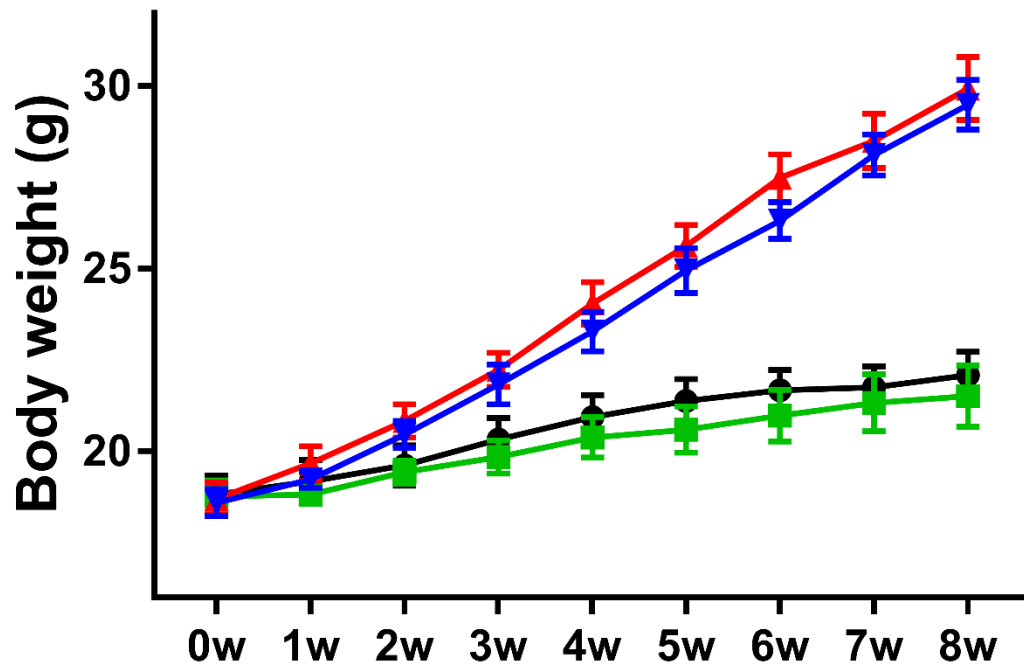

Supplementary Figure 2. Two-month-old C57BL6 mice were fed either control diet or HFD and supplemented with 0 or 1% (w/v) alpha-ketoglutarate for 2 mo. Body weight change during the treatment period. \*  $p < 0.05$  ( $n = 6$ , mean  $\pm$  SEM).

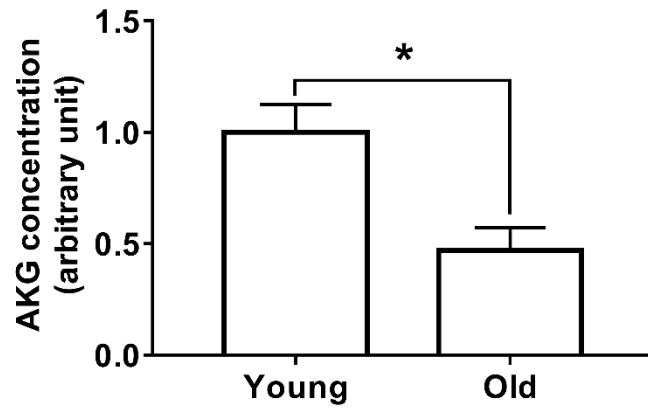

Supplementary Figure 3. Serum AKG content decreased in middle-aged mice. \*  $p < 0.05$  (n = 6, mean  $\pm$  SEM).

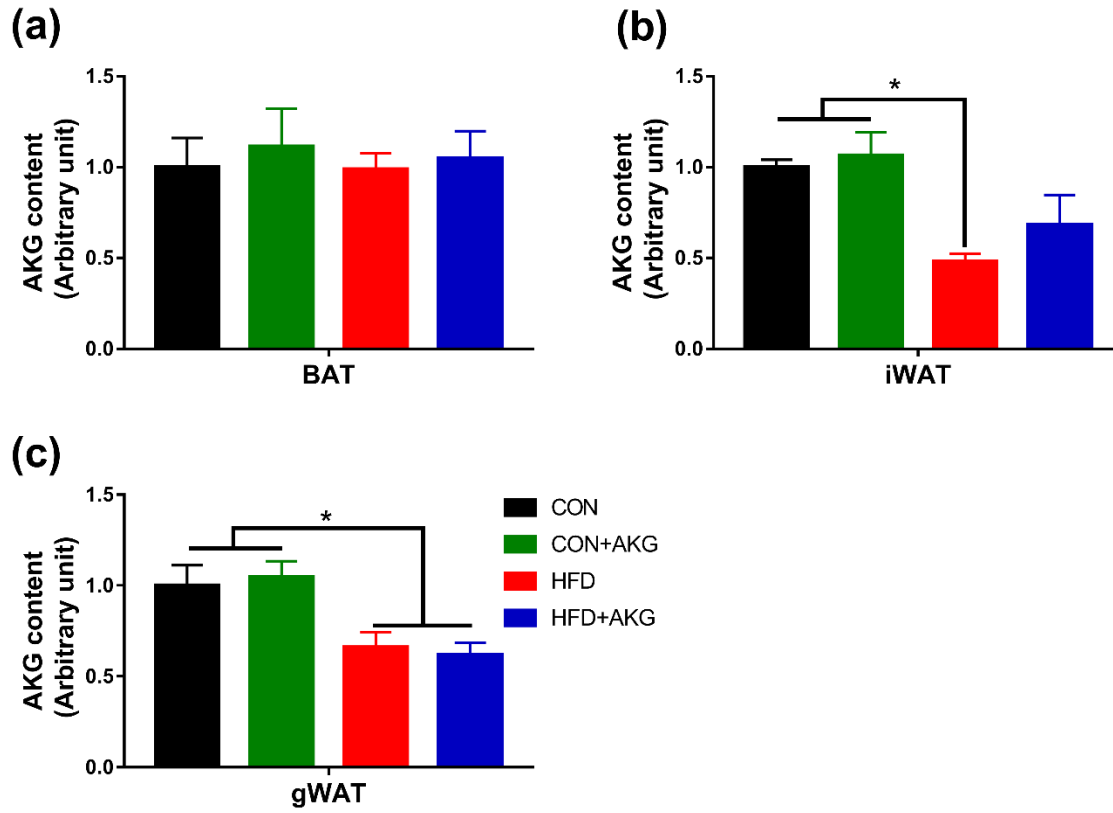

Supplementary Figure 4. AKG levels in BAT and WAT in young mice (2-month-old). (a) AKG concentration in BAT. (b) AKG concentration in iWAT. (c) AKG concentration in gWAT. \*  $p < 0.05$  ( $n = 6$ , mean  $\pm$  SEM).

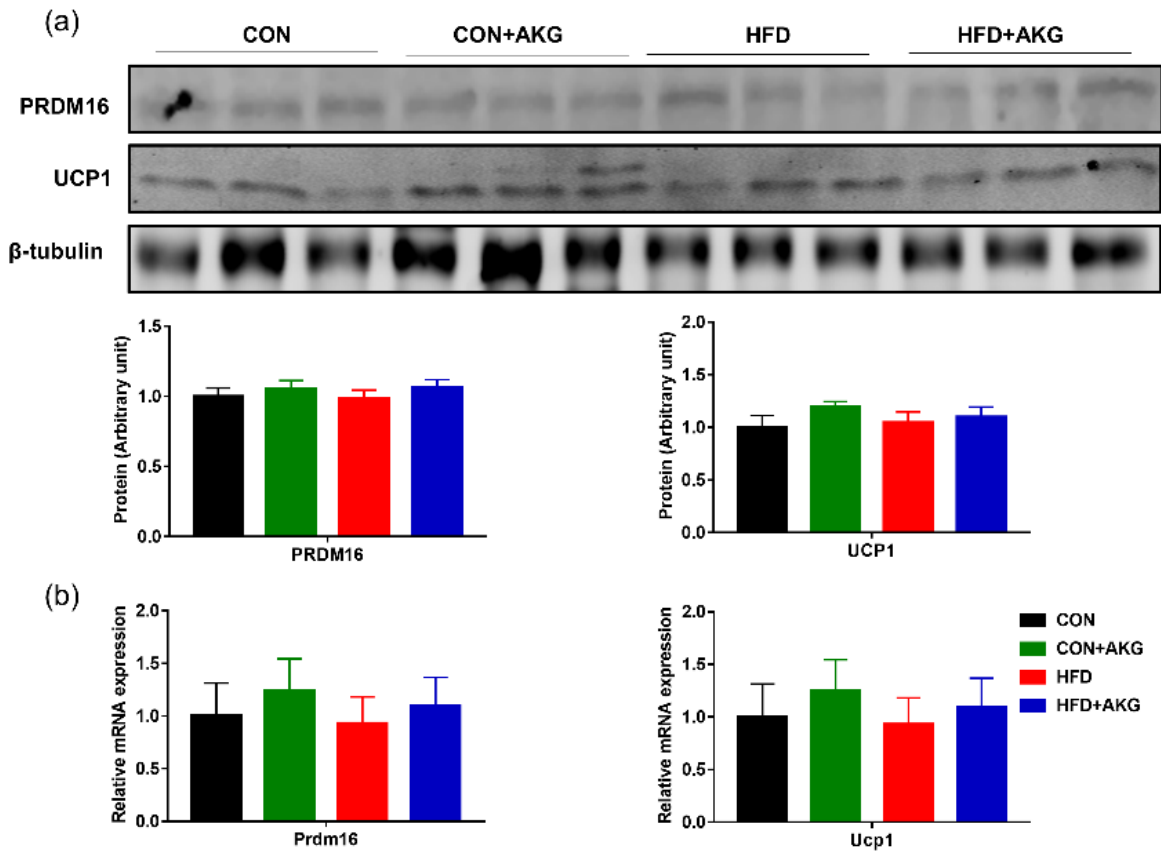

Supplemental Figure 5. Effect of alpha-ketoglutarate supplementation on metabolic activity of gWAT. (a) Protein contents of PRDM16 and UCP1 in BAT analyzed by western. (b) Brown adipose gene mRNA levels in BAT analyzed by q-PCR. \*  $p < 0.05$  ( $n = 6$ , mean  $\pm$  SEM).

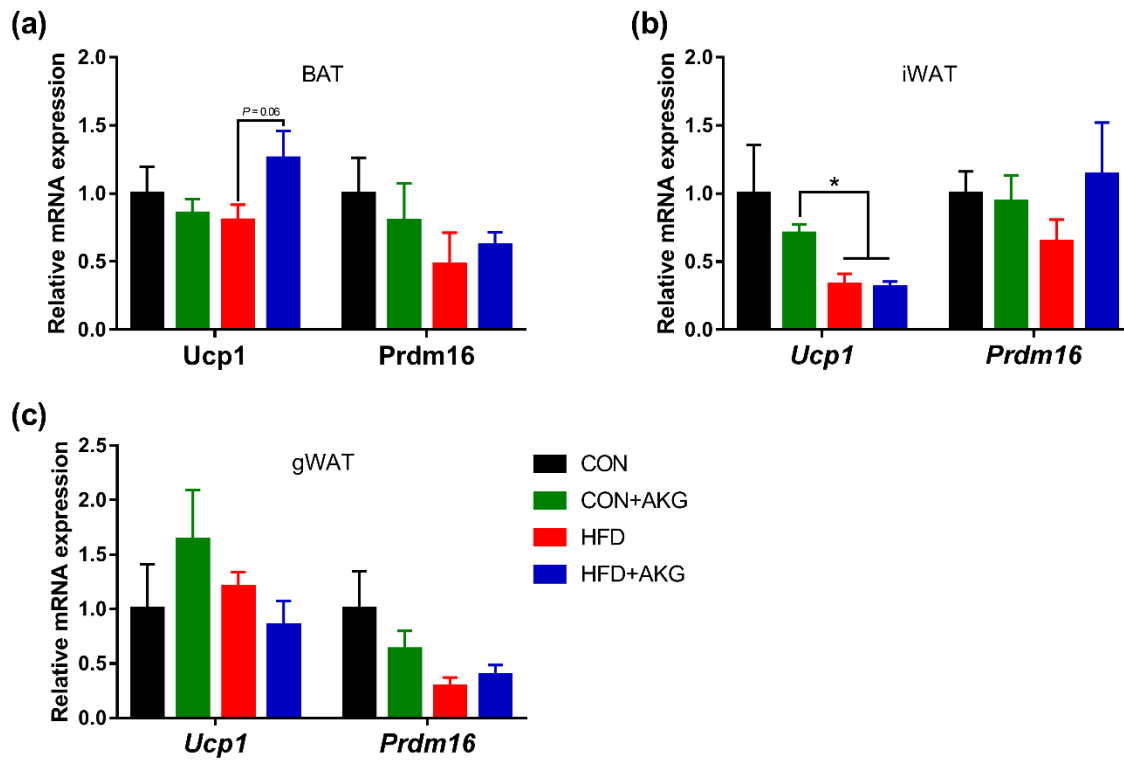

Supplementary Figure 6. Brown adipose gene mRNA levels in young mice. (a) Brown adipose gene mRNA levels in BAT analyzed by q-PCR. (b) Brown adipose gene mRNA levels in iWAT analyzed by q-PCR. (c) Brown adipose gene mRNA levels in gWAT analyzed by q-PCR. \* $p < 0.05$  ( $n = 6$ , mean  $\pm$  SEM).



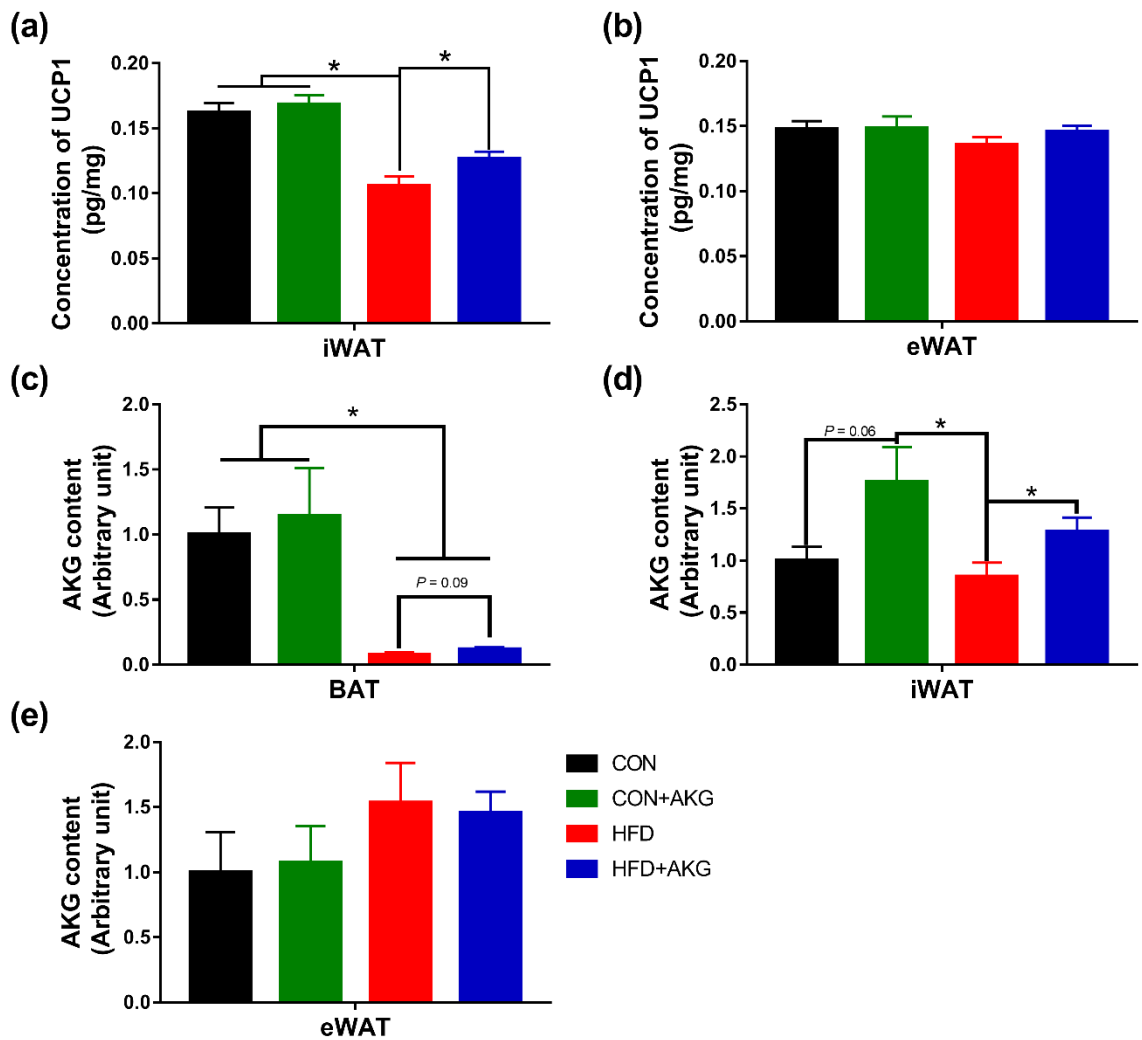

Supplementary Figure 7. UCP1 levels and AKG content in different adipose depots after cold exposure. (a) UCP-1 content in iWAT analyzed by q-PCR. (b) UCP-1 content in eWAT analyzed by q-PCR. (c-e) AKG content in BAT (c), iWAT (d) and eWAT (e). \* $p < 0.05$  ( $n = 6$ , mean  $\pm$  SEM).

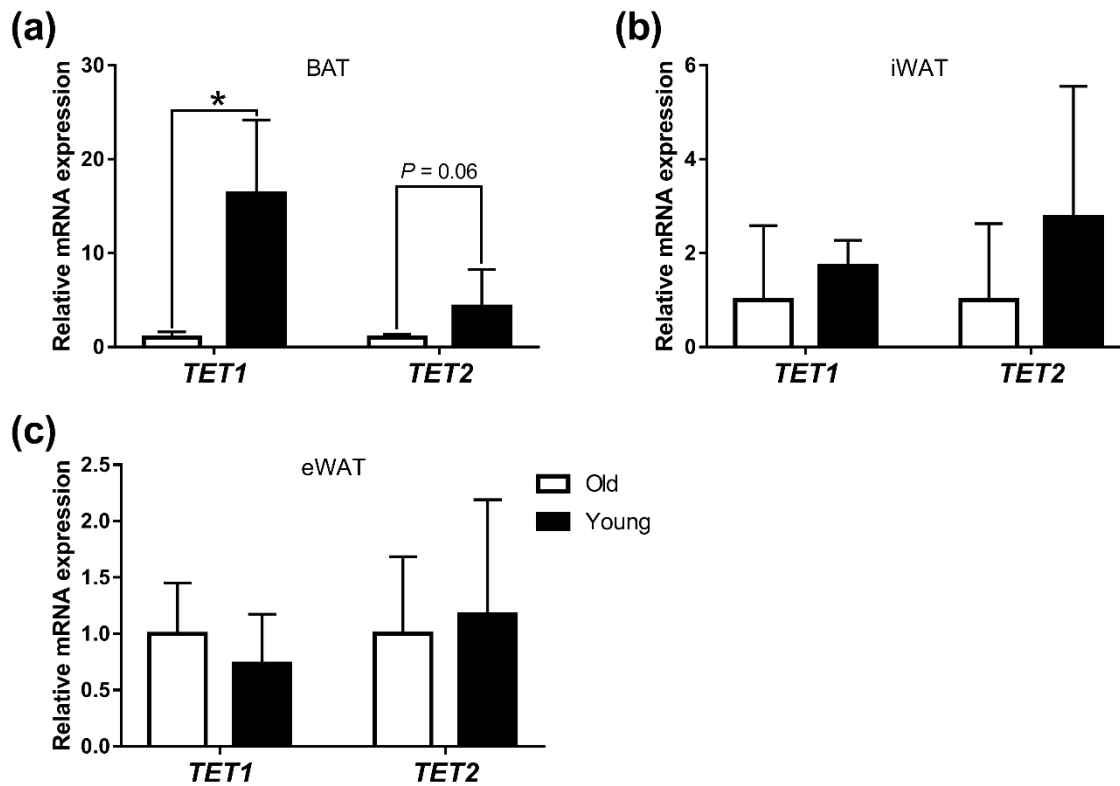

Supplementary Figure 8. Comparison of TET expression levels between young mice and middle-aged mice. (a) TET1 and TET2 mRNA expression in BAT analyzed by q-PCR. (b) TET1 and TET2 mRNA expression in iWAT analyzed by q-PCR. (c) TET1 and TET2 mRNA expression in eWAT analyzed by q-PCR. \* $p < 0.05$  ( $n = 6$ , mean  $\pm$  SEM).

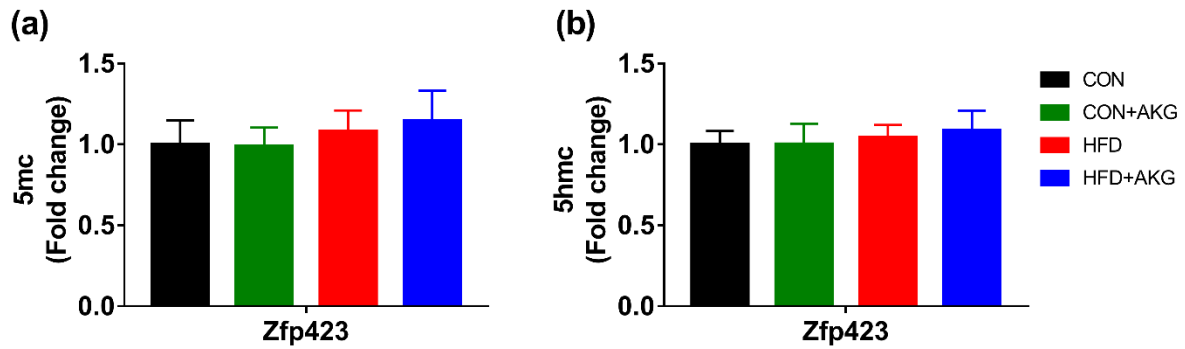

Supplementary Figure 9. DNA methylation of the *Zfp423* promoter after cold exposure. (a) Enrichment of 5mC at *Zfp423* promoter region relative to input normalized by the positive control in iWAT after cold exposure. (b) Enrichment of 5hmC at *Zfp423* promoter region relative to input normalized by the positive control in iWAT after cold exposure.
